# Supplementary material
Source: PubMed Central journal article supplement (PMC8025080)
Supplement: kaaa056_suppl_supplementary_material.pdf [file kaaa056_suppl_supplementary_material.pdf]

Electronic Supplementary Material (ESM)

Evaluation of a Text Messaging-Based Human Papillomavirus Vaccination Intervention for Young Sexual Minority Men: Results from a Pilot Randomized Controlled Trial

ESM Table 1. Acceptability of the txt2protect Intervention for Participants in the Intervention and Control Condition: Descriptive Statistics for Individual Items at 3-Week and 9-Month Follow-up

|                                                                                               | Intervention<br>M (SD) | Control<br>M (SD) | <i>p</i> | Cohen's <i>d</i> |
|-----------------------------------------------------------------------------------------------|------------------------|-------------------|----------|------------------|
| Acceptability at 3-week follow-up <sup>a</sup>                                                |                        |                   |          |                  |
| How likely would you be to recommend t2p to other guys your age? <sup>b</sup>                 | 4.40 (0.78)            | 4.23 (1.02)       | .273     | .19              |
| I like the t2p program.                                                                       | 4.39 (0.63)            | 4.32 (0.66)       | .506     | .11              |
| I learned things in t2p that will help me make good decisions for my health.                  | 4.66 (0.51)            | 4.52 (0.58)       | .144     | .26              |
| t2p provided helpful information about PrEP.                                                  | 4.42 (0.68)            | 4.48 (0.56)       | .556     | -.10             |
| t2p provided helpful information on HPV vaccination.                                          | 4.70 (0.46)            | 4.37 (0.70)       | .001     | .56              |
| t2p provided helpful information on getting tested for HIV/STIs.                              | 4.45 (0.59)            | 4.48 (0.58)       | .748     | -.05             |
| t2p provided helpful information about condoms.                                               | 4.24 (0.78)            | 4.49 (0.58)       | .029     | -.36             |
| I lost interest in reading the text messages by the end of the third week of the program. [R] | 2.36 (1.03)            | 2.60 (1.19)       | .196     | -.22             |
| t2p sent too many text messages. [R]                                                          | 2.95 (1.10)            | 3.21 (1.22)       | .203     | -.22             |
| t2p got in the way of my daily schedule. [R]                                                  | 1.85 (0.70)            | 2.14 (1.12)       | .075     | -.31             |
| The text messages were clear and easy to understand.                                          | 4.37 (0.69)            | 4.45 (0.58)       | .464     | -.13             |
| The text messages conveyed a respectful and supportive tone.                                  | 4.49 (0.75)            | 4.45 (0.73)       | .746     | .05              |
| Acceptability at 9-week follow-up                                                             |                        |                   |          |                  |
| How likely would you be to recommend t2p to other guys your age? <sup>b</sup>                 | 4.44 (0.84)            | 4.38 (0.81)       | .685     | .07              |
| I like the t2p program.                                                                       | 4.37 (0.68)            | 4.42 (0.58)       | .615     | -.08             |
| I learned things in t2p that will help me make good decisions for my health.                  | 4.51 (0.62)            | 4.51 (0.68)       | .995     | 0                |
| t2p will help other guys like me learn about HIV and STIs and how to prevent them.            | 4.58 (0.56)            | 4.54 (0.61)       | .666     | .07              |
| I do not think guys like me should go through the t2p program. [R]                            | 1.56 (0.74)            | 1.84 (0.90)       | .050     | -.34             |
| t2p sent too many text messages. [R]                                                          | 2.68 (1.13)            | 2.62 (1.03)       | .753     | .06              |
| t2p got in the way of my daily schedule. [R]                                                  | 1.85 (0.88)            | 1.72 (0.75)       | .362     | .16              |
| I lost interest in reading the text messages by the end of the program. [R]                   | 2.45 (1.20)            | 2.45 (1.15)       | .991     | 0                |
| The text messages were clear and easy to understand.                                          | 4.48 (0.59)            | 4.42 (0.63)       | .600     | .10              |
| The text messages conveyed a respectful and supportive tone.                                  | 4.63 (0.52)            | 4.46 (0.68)       | .108     | .28              |

I shared or plan to share things I learned in t2p with my friends. 3.90 (1.06) 3.90 (1.06) .987 0

Note. t2p = txt2protect. [R] = item was reversed scored before computing the acceptability scale score reported in the article. Means reported in this table were not reverse scored (i.e., they use the original scoring such that higher scores indicate more agreement with the statement). Sample size at 3-week follow-up: Intervention (n = 67); Control (n = 73). Sample size at 9-month follow-up: Intervention (n = 62); Control (n = 69). Independent samples t-tests were used to compare means by treatment arm.

<sup>a</sup> Unless noted otherwise, items were accompanied by a 5-point response scale: 1 = strongly disagree, 2 = disagree, 3 = neither agree nor disagree, 4 = agree, 5 = strongly agree.

<sup>b</sup> Item accompanied by a 5-point response scale: 1 = Very unlikely, 2 = somewhat unlikely, 3 = neither likely nor unlikely, 4 = likely, 5 = very likely.

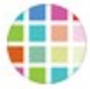

**IMPACT LGBT Health and Development Program**

Sponsored · 

PrEP. Condoms. Frequent Testing. These are just a few ways to protect your sexual health. Join txt2protect to learn more about playing safe and earn up to \$50 in Visa gift cards. txt2protect is entirely online and text message based.

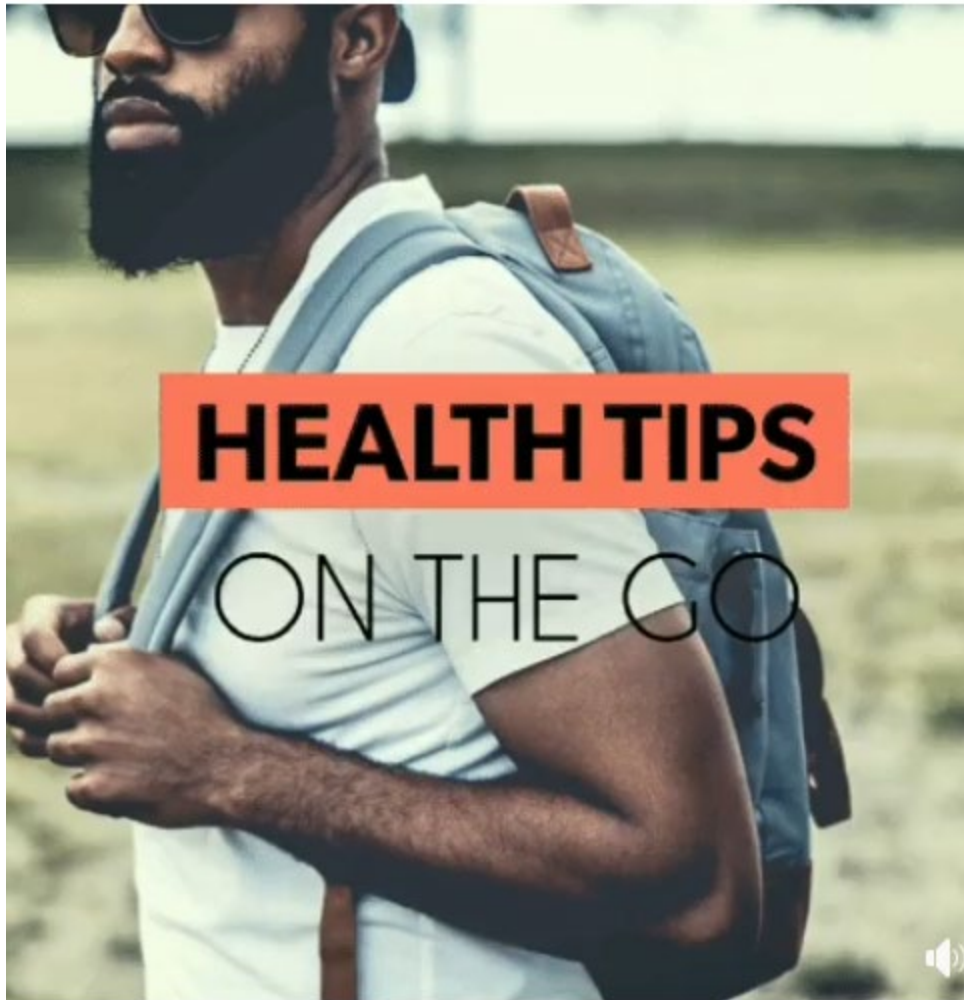

[GOO.GL](https://goo.gl)

**txt2protect - Tips on the Go**

[Sign Up](#)

ESM Figure 1. Sample Recruitment Advertisement Used on Facebook for the txt2protect Pilot Randomized Controlled Trial.

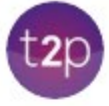

**txt2protect** @txt2protect · Jul 20, 2018

Receive text messages with tips for guarding against HPV, Hepatitis, and more! Complete online surveys and earn up to \$75 in Visa gift cards.

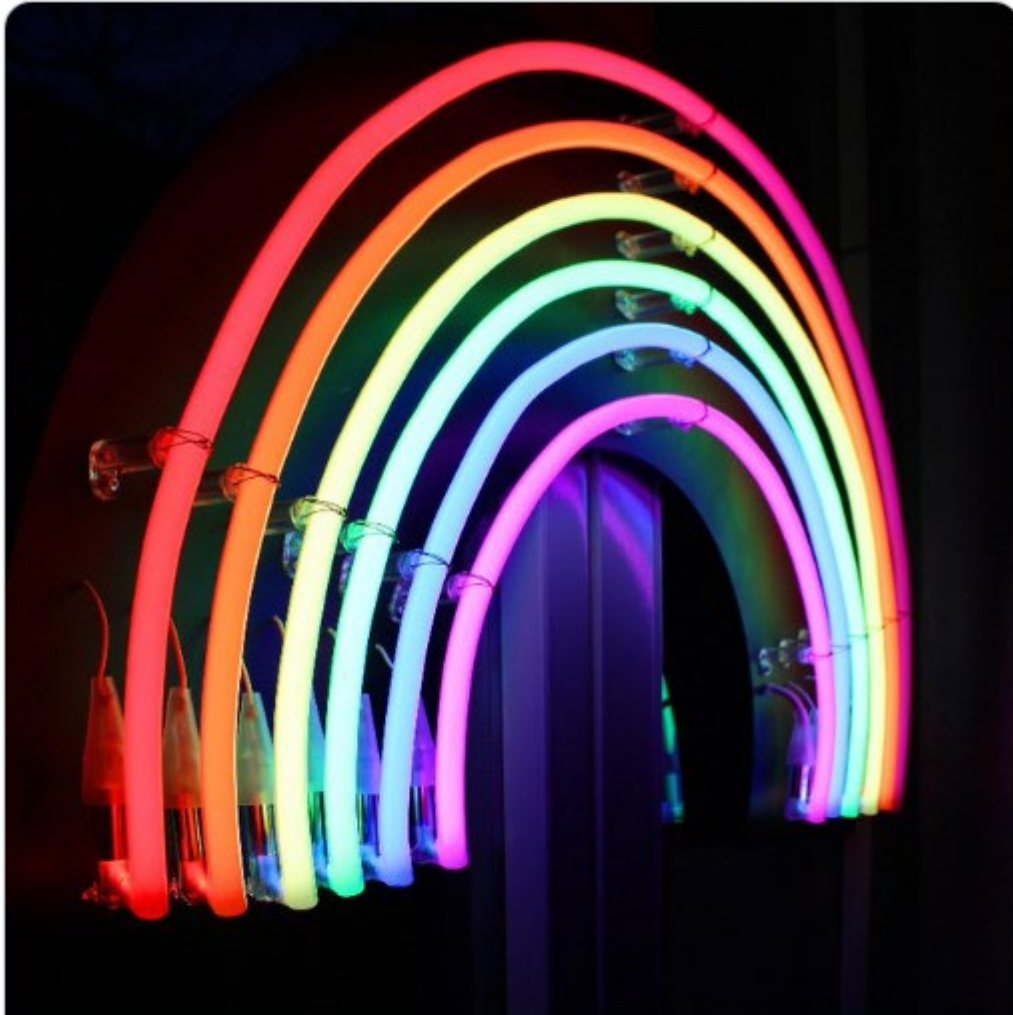

New Research Study for Gay, Bi, & Queer Guys  
[www.lgbtstudy.org](http://www.lgbtstudy.org)

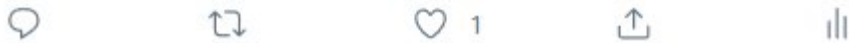

ESM Figure 2. Sample Recruitment Advertisement Used on Twitter for the txt2protect Pilot Randomized Controlled Trial.
